# Supplementary material
Source: ML conference proceedings conference paper supplement (https://proceedings.neurips.cc/paper_files/paper/2014/hash/01f78be6f7cad02658508fe4616098a9-Abstract.html)
Supplement: Supplementary file [file 01f78be6f7cad02658508fe4616098a9-Supplemental.zip]

## A Proof of Corollary 1

The second part follows from the fact that  $\log(1 - \eta)/\eta$  is an decreasing function on  $\eta \in (0, 1/2)$ . For the first part, we study two cases. In the first case, we assume that  $\widehat{L}_T(\mathcal{B}) \leq \widehat{L}_T(\mathcal{A})$  holds, which proves the statement for this case. For the second case, we assume the contrary and notice that

$$\begin{aligned} \sum_{t=1}^T (f_t(b_t) - f_t(a_t))^2 &\leq \sum_{t=1}^T |f_t(b_t) - f_t(a_t)| \\ &= \sum_{t=1}^T (f_t(b_t) - f_t(a_t))^+ + \sum_{t=1}^T (f_t(b_t) - f_t(a_t))^- , \end{aligned}$$

where  $(z)^+$  and  $(z)^-$  are the positive and negative parts of  $z \in \mathbb{R}$ , respectively. Now observe that

$$\sum_{t=1}^T (f_t(b_t) - f_t(a_t))^+ - \sum_{t=1}^T (f_t(b_t) - f_t(a_t))^- = \widehat{L}_T(\mathcal{B}) - \widehat{L}_T(\mathcal{A}) \geq 0,$$

implying

$$\sum_{t=1}^T (f_t(b_t) - f_t(a_t))^- \leq \sum_{t=1}^T (f_t(b_t) - f_t(a_t))^+$$

and thus

$$\sum_{t=1}^T (f_t(b_t) - f_t(a_t))^2 \leq 2 \sum_{t=1}^T (f_t(b_t) - f_t(a_t))^+ \leq 2\widehat{L}_T(\mathcal{B}) \leq 2C.$$

Plugging this result into the first bound of Thm. 1 and substituting the choice of  $\eta$  gives the result.

## B Anytime $(\mathcal{A}, \mathcal{B})$ -PROD

---

**Algorithm 1** Anytime  $(\mathcal{A}, \mathcal{B})$ -PROD

---

**Initialization:**  $\eta_1 = 1/2, w_{1,\mathcal{A}} = w_{1,\mathcal{B}} = 1/2$

**For all**  $t = 1, 2, \dots, T$ , **repeat**

1. Let

$$\eta_t = \sqrt{\frac{1}{1 + \sum_{s=1}^{t-1} (f_s(b_s) - f_s(a_s))^2}}$$

and

$$s_t = \frac{\eta_t w_{t,\mathcal{A}}}{\eta_t w_{t,\mathcal{A}} + w_{1,\mathcal{B}}/2}.$$

2. Observe  $a_t$  and  $b_t$  and predict

$$x_t = \begin{cases} a_t & \text{with probability } s_t, \\ b_t & \text{with probability } 1 - s_t. \end{cases}$$

3. Observe  $f_t$  and suffer loss  $f_t(x_t)$ .

4. Feed  $f_t$  to  $\mathcal{A}$  and  $\mathcal{B}$ .

5. Compute  $\delta_t = f_t(b_t) - f_t(a_t)$  and set

$$w_{t+1,\mathcal{A}} = w_{t,\mathcal{A}} \cdot (1 + \eta_{t-1} \delta_t)^{\eta_t / \eta_{t-1}}.$$


---

Algorithm 1 presents the adaptation of the adaptive-learning-rate PROD variant recently proposed by Gaillard et al. [11] to our setting. Following their analysis, we can prove the following performance guarantee concerning the adaptive version of  $(\mathcal{A}, \mathcal{B})$ -PROD.

**Theorem 6.** Let  $C$  be an upper bound on the total benchmark loss  $\widehat{L}_T(\mathcal{B})$ . Then anytime  $(\mathcal{A}, \mathcal{B})$ -PROD simultaneously guarantees

$$\mathfrak{R}_T((\mathcal{A}, \mathcal{B})\text{-PROD}, x) \leq \mathfrak{R}_T(\mathcal{A}, x) + K_T \sqrt{C + 1} + 2K_T$$

for any  $x \in \mathcal{S}$  and

$$\mathfrak{R}_T((\mathcal{A}, \mathcal{B})\text{-PROD}, \mathcal{B}) \leq 2 \log 2 + 2K_T$$

against any assignment of the loss sequence, where  $K_T = \mathcal{O}(\log \log T)$ .

There are some notable differences between the guarantees given by the above theorem and Thm. 1. The most important difference is that the current statement guarantees an improved regret of  $\mathcal{O}(\sqrt{T} \log \log T)$  instead of  $\sqrt{T} \log T$  in the worst case – however, this comes at the price of an  $\mathcal{O}(\log \log T)$  regret against the benchmark strategy.

## C Proof of Proposition 1

We start by stating the proposition more formally.

**Proposition 2.** Assume that there exist a partition of  $[1, T]$  into  $K$  intervals  $I_1, \dots, I_K$  such that the  $i$ -th component of the loss vectors within each interval  $I_k$  are drawn independently from a fixed probability distribution  $\mathcal{D}_{k,i}$  dependent on the index  $k$  of the interval and the identity of expert  $i$ . Furthermore, assume that at any time  $t$ , there exists a unique expert  $i_t^*$  and gap parameter  $\delta > 0$  such that  $\mathbb{E}[\ell_{t,i_t^*}] \leq \mathbb{E}[\ell_{t,i}] - \delta$  holds for all  $i \neq i_t^*$ . Then, the regret  $\text{FTL}(w)$  with parameter  $w > 0$  is bounded as

$$\mathbb{E}[\mathfrak{R}_T(\text{FTL}(w), y_{1:T})] \leq wK + NT \exp\left(-\frac{w\delta^2}{4}\right),$$

where the expectation is taken with respect to the distribution of the losses. Setting  $w = \lceil 4 \log(NT/K)/\delta^2 \rceil$ , the bound becomes

$$\mathbb{E}[\mathfrak{R}_T(\text{FTL}(w), y_{1:T})] \leq \frac{4K \log(NT/K)}{\delta^2} + 2K.$$

*Proof.* The proof is based on upper bounding the probabilities  $q_t = \mathbb{P}[b_t \neq i_t^*]$  for all  $t$ . First, observe that the contribution of a round when  $b_t = i_t^*$  to the expected regret is zero, thus the expected regret is upper bounded by  $\sum_{t=1}^T q_t$ . We say that  $t$  is in the  $w$ -interior of the partition if  $t \in I_k$  and  $t > \min\{I_k\} + w$  hold for some  $k$ , so that  $b_t$  is computed solely based on samples from  $\mathcal{D}_k$ . Let  $\hat{\ell}_t = \sum_{s=t-w-1}^{t-1} \ell_s$  and  $\bar{\ell}_t = \mathbb{E}[\ell_t]$ . By Hoeffding's inequality, we have that

$$\begin{aligned} q_t &= \mathbb{P}[b_t \neq i_t^*] \leq \mathbb{P}[\exists i : \hat{\ell}_{t,i_t^*} > \hat{\ell}_{t,i}] \\ &\leq \sum_{i=1}^N \mathbb{P}[(\bar{\ell}_{t,i} - \bar{\ell}_{t,i_t^*}) - (\hat{\ell}_{t,i} - \hat{\ell}_{t,i_t^*}) > \delta] \\ &\leq N \exp\left(-\frac{w\delta^2}{4}\right) \end{aligned}$$

holds for any  $t$  in the  $w$ -interior of the partition. The proof is concluded by observing that there are at most  $wK$  rounds outside the  $w$ -interval of the partition and using the trivial upper bound on  $q_t$  on such rounds.  $\square$
